# Supplementary material for: High-definition transcranial direct current stimulation (HD-tDCS) in major depressive disorder with anxious distress—a study protocol for a double-blinded randomized sham-controlled trial
Source: Springer Nature journal article supplement (doi:10.1186/s13063-024-08157-y), 2024-05-15

Additional file 1. HD-tDCS setting of electrode annotations

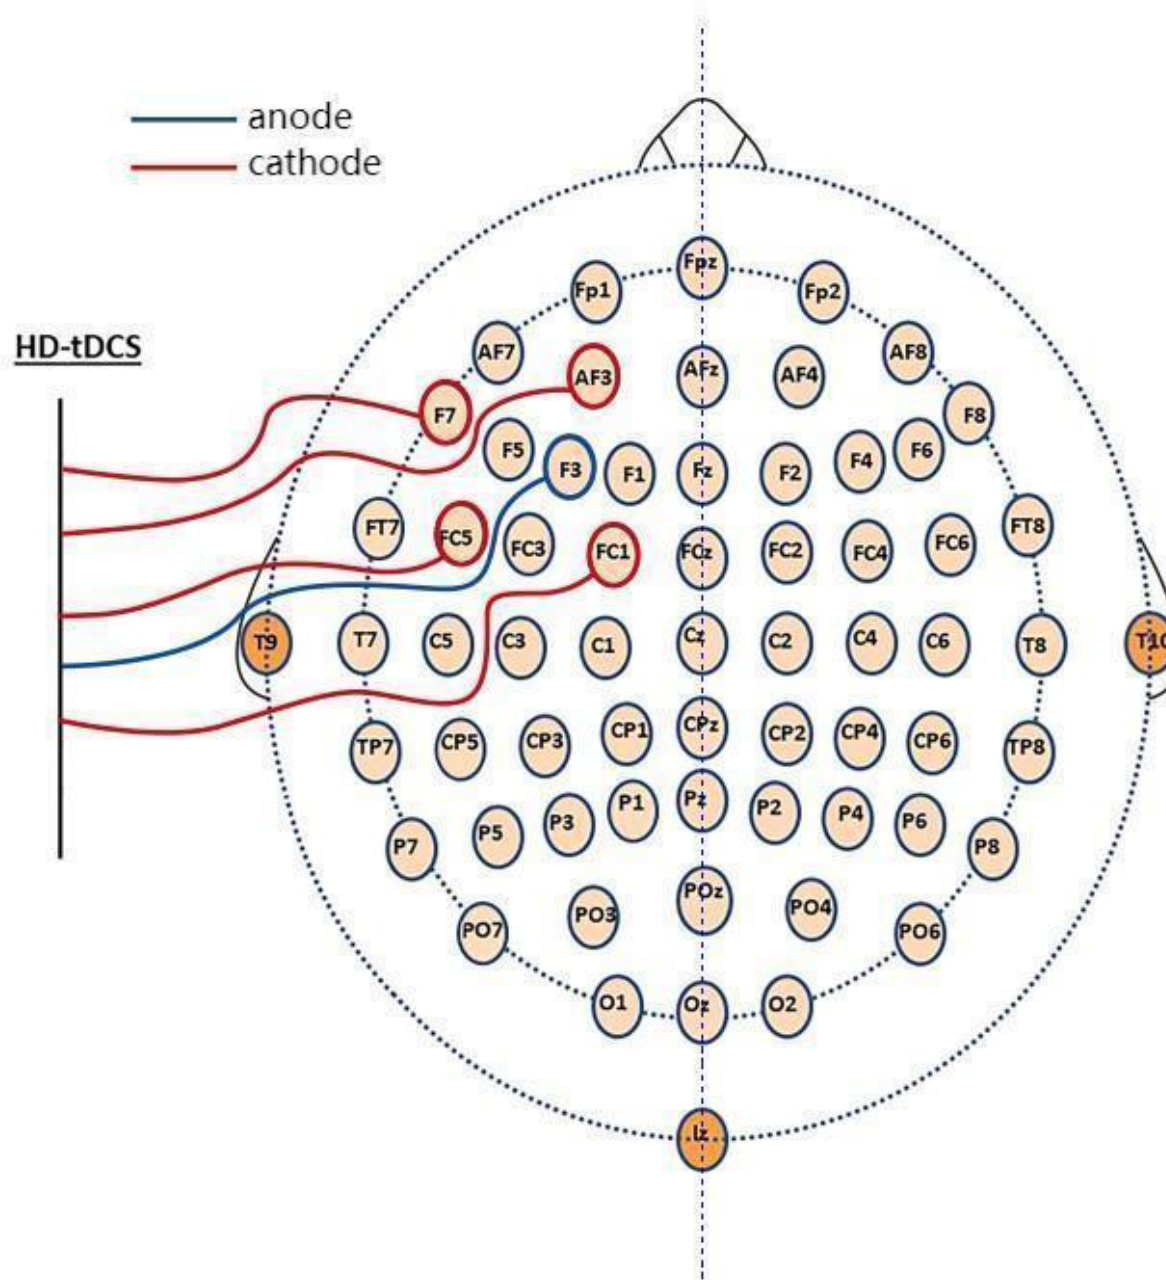

Supplement: MOESM1 [file 27095424]
